# Supplementary material for: High-quality all-inorganic CsPbBr3 single crystals prepared by a facile one-step solution growth method
Source: Royal Society of Chemistry journal article supplement (doi:10.1039/d2ra01900k), 2022-01-01
Supplement: d2ra01900k1.pdf [file d2ra01900k1.pdf]

*Supporting Information for*

**High-quality all-inorganic CsPbBr<sub>3</sub> single crystals prepared by a facile one-step solution growth method**

Mingming Chen<sup>a, b</sup>, Youwen Yuan<sup>b</sup>, Yuan Liu<sup>b</sup>, Dawei Cao<sup>\*b</sup>, and Chunxiang Xu<sup>\*a</sup>

<sup>1</sup> State Key Laboratory of Bioelectronics, School of Biological Science and Medical Engineering, Southeast University, Nanjing, Jiangsu 210096, China

<sup>2</sup> Department of Physics, School of Physics and Electronic Engineering, Jiangsu University, Zhenjiang, Jiangsu 212013, China

**\* Corresponding Authors**

**E-mail:** dwcao@ujs.edu.cn (D. Cao); xcxseu@seu.edu.cn (C. Xu)

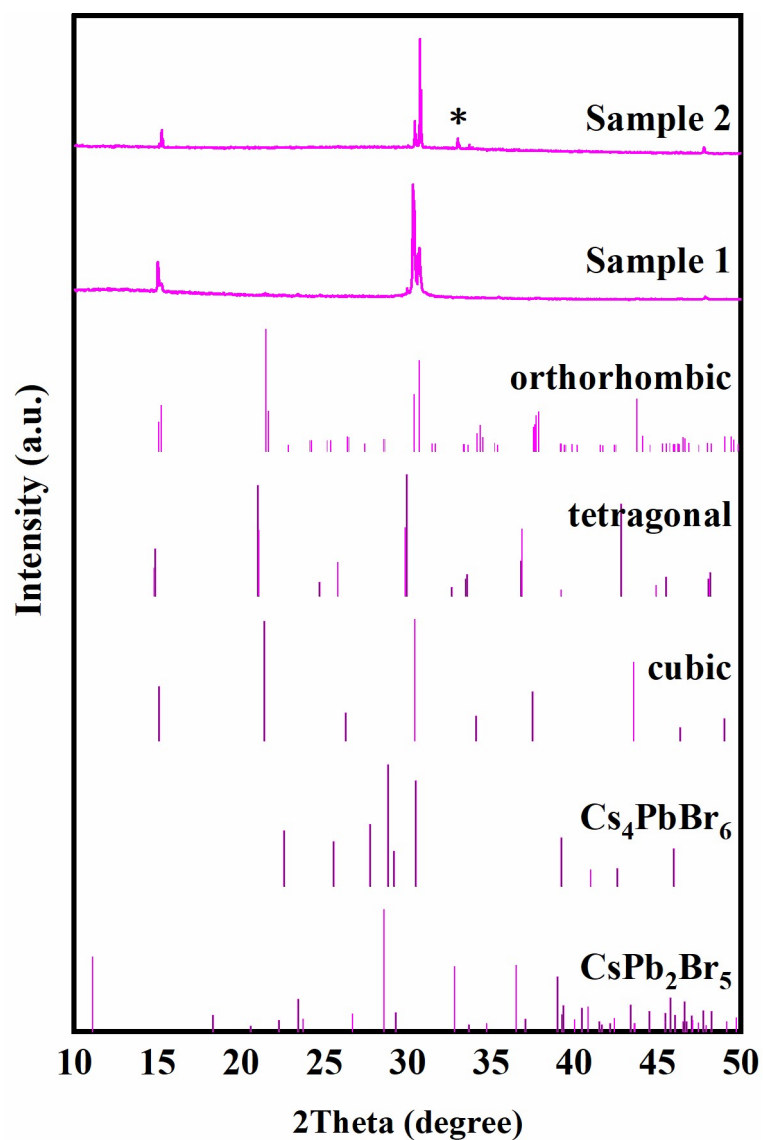

**Figure S1.** Powder XRD patterns of the as-grown CsPbBr<sub>3</sub> single crystal (**Sample 1**), *HPS* grown CsPbBr<sub>3</sub> single crystal (**Sample 2**), orthorhombic CsPbBr<sub>3</sub>, tetragonal CsPbBr<sub>3</sub>, cubic CsPbBr<sub>3</sub>, Cs<sub>4</sub>PbBr<sub>6</sub>, and CsPb<sub>2</sub>Br<sub>5</sub>. The diffraction peak (labeled as \*) in **Sample 2** is related to (310) of CsPb<sub>2</sub>Br<sub>5</sub>.

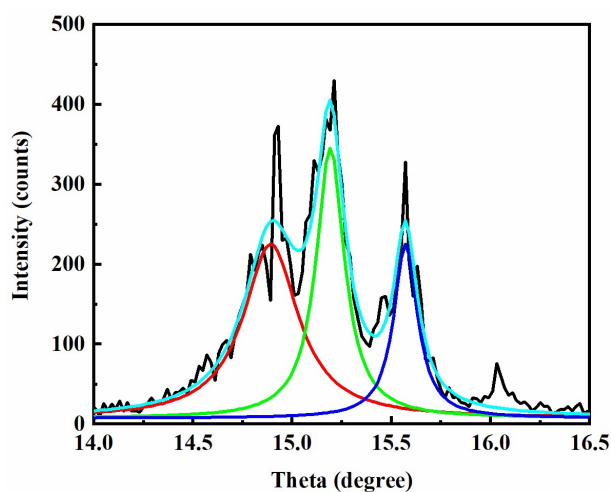

**Figure S2.** High-resolution XRD rocking curve spectrum (black) of CsPbBr<sub>3</sub> single crystals prepared using *HPS* method. The XRD rocking curve spectrum was fitted using the Lorentz function (shown in red, green, blue, and cyan lines). Here, the multi-diffraction peaks may be caused by complex multi-phase (CsPbBr<sub>3</sub>/CsPb<sub>2</sub>Br<sub>5</sub>) of the sample, in which the peak at 15.09° is assigned to (002) of CsPbBr<sub>3</sub>.

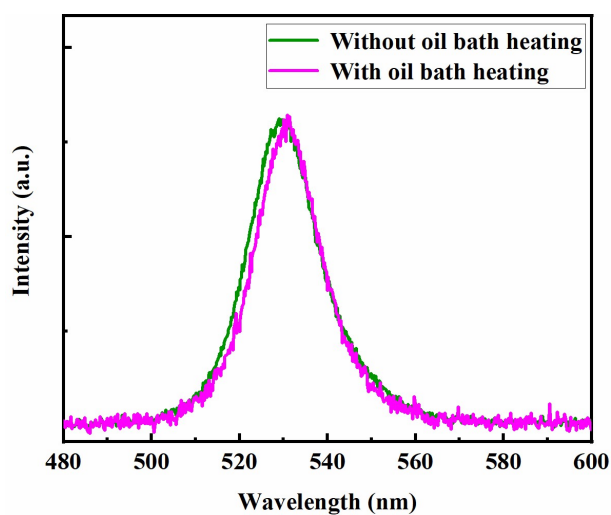

**Figure S3.** PL spectra of CsPbBr<sub>3</sub> single crystals prepared with and without oil bath heating.

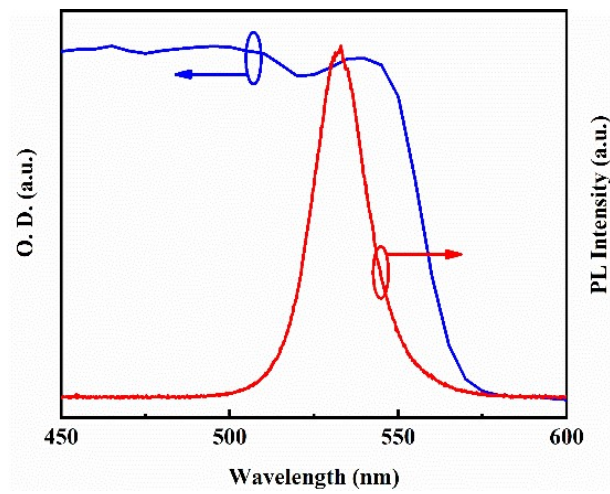

**Figure S4.** PL and absorption spectra of CsPbBr<sub>3</sub> single crystal.

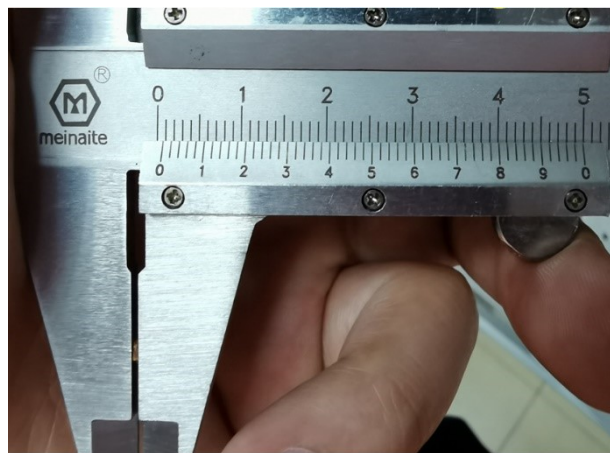

**Figure S5.** The thickness of the selected CsPbBr<sub>3</sub> single crystals for  $I$ - $V$  measurements.

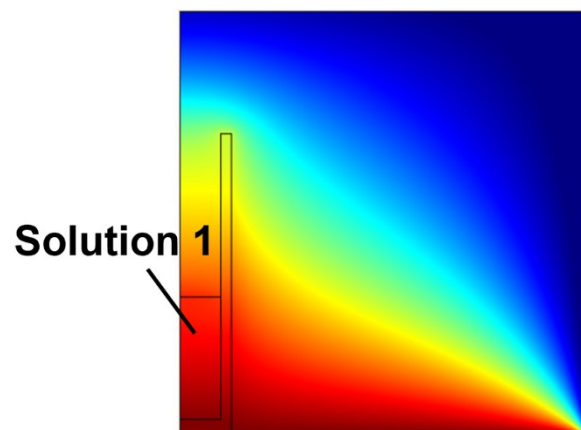

**Figure S6.** Calculated steady-state temperature field distribution of the precursor solution (labeled as solution 1) heated on the hot table.

**Table S1.** Comparison of trap density of CsPbBr<sub>3</sub> single crystal reported in this work and related results reported previously.

| Material                                          | Method                                                     | Trap density<br>(cm <sup>-3</sup> ) | Reference |
|---------------------------------------------------|------------------------------------------------------------|-------------------------------------|-----------|
| CsPbBr <sub>3</sub>                               | Inverse temperature crystallization                        | 1.1×10 <sup>10</sup>                | 1         |
| CsPbBr <sub>3</sub>                               | Bridgman                                                   | 1.9×10 <sup>9</sup>                 | 2         |
| CsPbBr <sub>3</sub>                               | Bridgman                                                   | 6.3×10 <sup>10</sup>                | 3         |
| CsPbBr <sub>3</sub>                               | Antisolvent vapor                                          | 2.8×10 <sup>10</sup>                | 4         |
| CsPbBr <sub>3</sub>                               | Low-temperature crystallization in water                   | 1.7×10 <sup>10</sup>                | 5         |
| CsPbBr <sub>3</sub>                               | Inverse temperature crystallization                        | 7.6×10 <sup>10</sup>                | 5         |
| CH <sub>3</sub> NH <sub>3</sub> PbBr <sub>3</sub> | seed-induced heterogeneous nucleation                      | 2.6×10 <sup>10</sup>                | 6         |
| CH <sub>3</sub> NH <sub>3</sub> PbBr <sub>3</sub> | cavitation-triggered asymmetric crystallization            | ~ 10 <sup>11</sup>                  | 7         |
| CH <sub>3</sub> NH <sub>3</sub> PbI <sub>3</sub>  | Inverse temperature crystallization with ligand regulation | 7×10 <sup>10</sup>                  | 8         |
| CH <sub>3</sub> NH <sub>3</sub> PbBr <sub>3</sub> | liquid-diffused separation induced crystallization         | 4.4×10 <sup>9</sup>                 | 9         |
| CH <sub>3</sub> NH <sub>3</sub> PbI <sub>3</sub>  | Inverse temperature crystallization                        | 1.4×10 <sup>10</sup>                | 10        |
| CH <sub>3</sub> NH <sub>3</sub> PbBr <sub>3</sub> | Inverse temperature crystallization                        | 3×10 <sup>10</sup>                  | 10        |
| CsPbBr <sub>3</sub>                               | HPS with an oil bath heating                               | 5.1×10 <sup>9</sup>                 | This work |

## Reference

- Saidaminov, M. I.; Haque, M. A.; Almutlaq, J.; Sarmah, S.; Miao, X.; Begum, R.; Zhumekenov, A. A.; Dursun, I.; Cho, N.; Murali, B.; Mohammed, O. F.; Wu, T.; Bakr, O. M., Inorganic Lead Halide Perovskite Single Crystals: Phase-Selective Low-Temperature Growth, Carrier Transport Properties, and Self-Powered Photodetection. *Adv. Opt. Mater.* **2017**, *5* (2), 1600704.
- Song, J.; Cui, Q.; Li, J.; Xu, J.; Wang, Y.; Xu, L.; Xue, J.; Dong, Y.; Tian, T.; Sun, H.; Zeng, H., Ultralarge All-Inorganic Perovskite Bulk Single Crystal for High-Performance Visible–Infrared Dual-Modal Photodetectors. *Adv. Opt. Mater.* **2017**, *5* (12), 1700157.
- Zhang, P.; Zhang, G.; Liu, L.; Ju, D.; Zhang, L.; Cheng, K.; Tao, X., Anisotropic Optoelectronic Properties of Melt-Grown Bulk CsPbBr<sub>3</sub> Single Crystal. *J. Phys. Chem. Lett.* **2018**, *9* (17), 5040-5046.

4. Miao, X.; Qiu, T.; Zhang, S.; Ma, H.; Hu, Y.; Bai, F.; Wu, Z., Air-stable CsPb $_{1-x}$ BixBr $_3$  ( $0 \leq x \ll 1$ ) perovskite crystals: optoelectronic and photostriction properties. *J. Mater. Chem. C* **2017**, *5* (20), 4931-4939.
5. Peng, J.; Xia, C. Q.; Xu, Y.; Li, R.; Cui, L.; Clegg, J. K.; Herz, L. M.; Johnston, M. B.; Lin, Q., Crystallization of CsPbBr $_3$  single crystals in water for X-ray detection. *Nat. Commun.* **2021**, *12* (1), 1531.
6. Liu, Y.; Yang, Z.; Cui, D.; Ren, X.; Sun, J.; Liu, X.; Zhang, J.; Wei, Q.; Fan, H.; Yu, F.; Zhang, X.; Zhao, C.; Liu, S., Two-Inch-Sized Perovskite CH $_3$ NH $_3$ PbX $_3$  (X = Cl, Br, I) Crystals: Growth and Characterization. *Adv. Mater.* **2015**, *27* (35), 5176-5183.
7. Peng, W.; Wang, L.; Murali, B.; Ho, K.; Bera, A.; Cho, N.; Kang, C.; Burlakov, V. M.; Pan, J.; Sinatra, L.; Ma, C.; Xu, W.; Shi, D.; Alarousu, E.; Goriely, A.; He, J.; Mohammed, O. F.; Wu, T.; Bakr, O. M., Solution-Grown Monocrystalline Hybrid Perovskite Films for Hole-Transporter-Free Solar Cells. *Adv. Mater.* **2016**, *28* (17), 3383-3390.
8. Liu, Y.; Zheng, X.; Fang, Y.; Zhou, Y.; Ni, Z.; Xiao, X.; Chen, S.; Huang, J., Ligand assisted growth of perovskite single crystals with low defect density. *Nat. Commun.* **2021**, *12* (1), 1686.
9. Yao, F.; Peng, J.; Li, R.; Li, W.; Gui, P.; Li, B.; Liu, C.; Tao, C.; Lin, Q.; Fang, G., Room-temperature liquid diffused separation induced crystallization for high-quality perovskite single crystals. *Nat. Commun.* **2020**, *11* (1), 1194.
10. Saidaminov, M. I.; Abdelhady, A. L.; Murali, B.; Alarousu, E.; Burlakov, V. M.; Peng, W.; Dursun, I.; Wang, L.; He, Y.; Maculan, G.; Goriely, A.; Wu, T.; Mohammed, O. F.; Bakr, O. M., High-quality bulk hybrid perovskite single crystals within minutes by inverse temperature crystallization. *Nat. Commun.* **2015**, *6* (1), 7586.
